# Supplementary material for: Validating the high-precision measurement of Mo isotopes at the 5 ng level using double spike MC-ICP-MS
Source: Royal Society of Chemistry journal article supplement (doi:10.1039/d1ja00465d), 2022-01-01
Supplement: d1ja00465d1.pdf [file d1ja00465d1.pdf]

## **Validating the high-precision measurement of Mo isotopes at the 5 ng level using double spike MC-ICP-MS**

Hong-Gang Zhu<sup>a</sup>, Jian-Ming Zhu<sup>a\*</sup>, Decan Tan<sup>b</sup>, Xuan Lin<sup>a</sup>, Kaite Lu<sup>a</sup> and Wen Yang<sup>a</sup>

<sup>a</sup> State Key Laboratory of Geological Processes and Mineral Resources, China University of Geosciences (Beijing, Beijing 100083, China.

<sup>b</sup> State Key Laboratory of Environmental Geochemistry, Institute of Geochemistry, Chinese Academy of Sciences, Guiyang, 550081, China.

\* Corresponding author: Jian-Ming Zhu

Phone: 86-010-82322832;

E-mail: [jmzhu@cugb.edu.cn](mailto:jmzhu@cugb.edu.cn)

2022-03-07

Suppl table 1

Table 1. The cleaning procedures of cation and anion resins for Mo purification

| Separation stage                                                           | Reagent                                         | Volume/ml |
|----------------------------------------------------------------------------|-------------------------------------------------|-----------|
| Resin: Cation exchange resin (AG50W-X8, 200–400 mesh, 2 mL)                |                                                 |           |
| Clean resin                                                                | 3.5 M HNO <sub>3</sub>                          | 6         |
| Clean resin                                                                | 8 M HF + 2 M HCl                                | 6         |
| Clean resin                                                                | 6 M HCl                                         | 8         |
| Clean resin                                                                | MQ H <sub>2</sub> O                             | 10        |
| Clean resin                                                                | 0.5 M HCl + 0.3 % H <sub>2</sub> O <sub>2</sub> | 10        |
| Clean resin                                                                | MQ H <sub>2</sub> O                             | 10        |
| Resin: Anion exchange resin (Muromac <sup>®</sup> 1X8, 100–200 mesh, 2 mL) |                                                 |           |
| Clean resin                                                                | 3.5 M HNO <sub>3</sub>                          | 10        |
| Clean resin                                                                | 1 M HCl                                         | 20        |
| Clean resin                                                                | 0.1 M HCl                                       | 10        |
| Clean resin                                                                | MQ H <sub>2</sub> O                             | 10        |
| Clean resin                                                                | 8 M HF + 2 M HCl                                | 10        |
| Clean resin                                                                | MQ H <sub>2</sub> O                             | 10        |
